# Supplementary material for: CDKN2A/B homozygous deletion is associated with early recurrence in meningiomas
Source: Springer Nature journal article supplement (doi:10.1007/s00401-020-02188-w), 2020-07-08

## Supplementary Methods

**Sample collection.** Tumor samples and clinical follow-up data from the 528 patients were obtained from the archives of multiple international collaborating centers and collected at the Department of Neuropathology, University Hospital Heidelberg (Heidelberg, Germany). Tissue sample collection and processing, data collection and use were performed in accordance with local ethics regulations and approvals.

**DNA methylation array processing.** Genomic DNA was extracted from fresh-frozen or formalin-fixed and paraffin-embedded (FFPE) tissue samples. The Illumina Infinium HumanMethylation450 (450k) array and Illumina Infinium MethylationEPIC (EPIC) array was used to obtain genome-wide DNA for tumor samples according to the manufacturer's instructions (Illumina, San Diego, CA, USA) and as previously described [1]. Data was generated at the Genomics and Proteomics Core Facility of the DKFZ (Heidelberg, Germany) or the Department of Neuropathology (Heidelberg, Germany). DNA methylation data were generated from both fresh-frozen and formalin-fixed paraffin-embedded (FFPE) tissue samples. For most fresh-frozen samples, >500ng of DNA was used as input material. 250ng of DNA was used for most FFPE tissues. All computational analyses were performed in R version 3.3.1 (R Development Core Team, 2016; <https://www.R-project.org>).

**Determination of *TERT* promoter mutation status.** *TERT* promoter mutation status was assessed by Sanger sequencing or next generation gene panel sequencing. Capture-based next-generation DNA sequencing was performed on a NextSeq 500 instrument (Illumina) as previously described [2] using a custom brain tumor panel covering the entire coding and selected intronic and promoter regions of 130 genes of particular relevance in central nervous system tumors. Reads were aligned against the reference genome (GRCh37). Sanger sequencing was performed as described [3].

**Statistical analysis.** Fisher's exact test was used to compare categorical parameters. Wilcoxon Mann-Whitney test was used to compare the age distribution. Distribution of time to progression or recurrence (TTP) after surgery was estimated by the Kaplan-Meier method and compared between groups with the log-rank test. Multivariable Cox proportional hazards regression was used to estimate the prognostic impact after adjusting for established prognostic factors. For the multivariable Cox model missing value imputation was performed using the mice algorithm [4]. The likelihood-ratio test between the Cox model with and without interaction term of *CDKN2A/B* status and each clinico-pathological factor was used to determine potential subgroup effects of *CDKN2A/B* status (interaction p-value). P-values below 0.05 were considered significant.

## References

1. Capper D, Jones DTW, Sill M, *et al.* DNA methylation-based classification of central nervous system tumours. *Nature* 2018;555(7697):469-474.
2. Sahm F, Schrimpf D, Jones DT, *et al.* Next-generation sequencing in routine brain tumor diagnostics enables an integrated diagnosis and identifies actionable targets. *Acta Neuropathol* 2016;131(6):903-10.
3. Koelsche C, Sahm F, Capper D, *et al.* Distribution of TERT promoter mutations in pediatric and adult tumors of the nervous system. *Acta Neuropathol* 2013;126(6):907-15.
4. Van Buuren S, Groothuis-Oudshoorn K. mice: Multivariate Imputation by Chained Equations in R. *J Stat Softw* 2011, (45):1–67.

**Suppl. Table 1 – Association with clinico-pathological factors**

| Level              |                                         | wt                   | homozy del           | p      |
|--------------------|-----------------------------------------|----------------------|----------------------|--------|
| n                  |                                         | 502                  | 26                   |        |
| Age (median [IQR]) |                                         | 58.00 [48.00, 67.00] | 59.00 [52.25, 65.00] | 0.691  |
| Sex (%)            | F                                       | 331 (65.9)           | 19 (73.1)            | 0.528  |
|                    | M                                       | 171 (34.1)           | 7 (26.9)             |        |
| Histology (%)      | Meningothelial meningioma (WHO Grade I) | 21 (4.2)             | 0 (0.0)              | <0.001 |
|                    | Fibroblastic meningioma (WHO Grade I)   | 28 (5.6)             | 0 (0.0)              |        |
|                    | Transitional meningioma (WHO Grade I)   | 65 (12.9)            | 0 (0.0)              |        |
|                    | Psammomatous meningioma (WHO grade I)   | 23 (4.6)             | 0 (0.0)              |        |
|                    | Angiomatous meningioma (WHO Grade I)    | 14 (2.8)             | 0 (0.0)              |        |
|                    | Microcystic meningioma (WHO grade I)    | 13 (2.6)             | 0 (0.0)              |        |
|                    | Secretory meningioma (WHO grade I)      | 24 (4.8)             | 0 (0.0)              |        |
|                    | Metaplastic meningioma (WHO Grade I)    | 8 (1.6)              | 0 (0.0)              |        |
|                    | Meningioma NOS                          | 51 (10.2)            | 0 (0.0)              |        |
|                    | Chordoid meningioma (WHO grade II)      | 24 (4.8)             | 0 (0.0)              |        |
|                    | Clear cell meningioma (WHO grade II)    | 4 (0.8)              | 0 (0.0)              |        |
|                    | Atypical meningioma (WHO grade II)      | 176 (35.1)           | 7 (26.9)             |        |
|                    | Rhabdoid meningioma (WHO grade III)     | 1 (0.2)              | 0 (0.0)              |        |
|                    | Anaplastic meningioma (WHO grade III)   | 50 (10.0)            | 19 (73.1)            |        |
| Location (%)       | basal                                   | 92 (19.3)            | 3 (11.5)             | 0.298  |
|                    | convexity                               | 287 (60.3)           | 21 (80.8)            |        |
|                    | posterior fossa                         | 36 (7.6)             | 2 (7.7)              |        |
|                    | spinal                                  | 27 (5.7)             | 0 (0.0)              |        |
|                    | supratentorial                          | 34 (7.1)             | 0 (0.0)              |        |
| WHO grade (%)      | I                                       | 238 (47.4)           | 0 (0.0)              | <0.001 |
|                    | II                                      | 213 (42.4)           | 7 (26.9)             |        |
|                    | III                                     | 51 (10.2)            | 19 (73.1)            |        |
| MC (%)             | ben                                     | 240 (47.8)           | 0 (0.0)              | <0.001 |
|                    | int                                     | 218 (43.4)           | 6 (23.1)             |        |
|                    | mal                                     | 44 (8.8)             | 20 (76.9)            |        |
| TERT (%)           | no                                      | 274 (98.9)           | 13 (81.2)            | 0.002  |
|                    | yes                                     | 3 (1.1)              | 3 (18.8)             |        |
| TERTvar (%)        | C228T                                   | 1 (33.3)             | 2 (66.7)             | 1.000  |
|                    | C250T                                   | 2 (66.7)             | 1 (33.3)             |        |

Abbreviations: F – female, M – male, WHO - World Health Organization, MC – methylation class, ben – benign, int – intermediate, mal – malignant, wt – wildtype, homozy del - homozygous deletion, NOS - not otherwise specified. Meningioma NOS indicates that a specific subtyping of the meningioma was not available (inconclusive and/or material lacking for additional review).

**Suppl. Table 2 – Clinico-pathological characteristics**

| Case # | Histology                             | WHO grade | Sex | Age (yrs) | PFS (m) | Progr./Rec.(1=yes;0=no) | Location stand. | CDKN2A/B status | Methylation class | TERT promoter status |
|--------|---------------------------------------|-----------|-----|-----------|---------|-------------------------|-----------------|-----------------|-------------------|----------------------|
| MNG_01 | Anaplastic meningioma (WHO grade III) | 3         | M   | 49        | 3       | 1                       | convexity       | homozy. del     | mal               | wt                   |
| MNG_02 | Atypical meningioma (WHO grade II)    | 2         | F   | 78        | 22      | 1                       | convexity       | homozy. del     | mal               | wt                   |
| MNG_03 | Atypical meningioma (WHO grade II)    | 2         | F   | 61        | 9       | 1                       | convexity       | homozy. del     | mal               | wt                   |
| MNG_04 | Atypical meningioma (WHO grade II)    | 2         | F   | 54        | 53      | 0                       | posterior fossa | homozy. del     | int               | wt                   |
| MNG_05 | Anaplastic meningioma (WHO grade III) | 3         | F   | 22        | 7       | 1                       | posterior fossa | homozy. del     | mal               | wt                   |
| MNG_06 | Anaplastic meningioma (WHO grade III) | 3         | M   | 58        | 48      | 1                       | convexity       | homozy. del     | mal               | wt                   |
| MNG_07 | Anaplastic meningioma (WHO grade III) | 3         | F   | N/A       | 5       | 0                       | convexity       | homozy. del     | mal               | wt                   |
| MNG_08 | Anaplastic meningioma (WHO grade III) | 3         | M   | 48        | 5       | 1                       | convexity       | homozy. del     | mal               | wt                   |
| MNG_09 | Anaplastic meningioma (WHO grade III) | 3         | F   | 68        | 8       | 1                       | convexity       | homozy. del     | mal               | wt                   |
| MNG_10 | Anaplastic meningioma (WHO grade III) | 3         | M   | 53        | 6       | 1                       | convexity       | homozy. del     | mal               | wt                   |
| MNG_11 | Anaplastic meningioma (WHO grade III) | 3         | F   | 55        | 11      | 1                       | convexity       | homozy. del     | mal               | N/A                  |
| MNG_12 | Anaplastic meningioma (WHO grade III) | 3         | F   | 64        | 2       | 1                       | convexity       | homozy. del     | int               | N/A                  |
| MNG_13 | Anaplastic meningioma (WHO grade III) | 3         | F   | 61        | 1       | 0                       | convexity       | homozy. del     | mal               | N/A                  |
| MNG_14 | Anaplastic meningioma (WHO grade III) | 3         | F   | 74        | 5       | 0                       | basal           | homozy. del     | mal               | N/A                  |
| MNG_15 | Anaplastic meningioma (WHO grade III) | 3         | F   | 56        | 7       | 1                       | convexity       | homozy. del     | int               | N/A                  |
| MNG_16 | Anaplastic meningioma (WHO grade III) | 3         | F   | 56        | 1       | 1                       | convexity       | homozy. del     | int               | N/A                  |
| MNG_17 | Anaplastic meningioma (WHO grade III) | 3         | F   | 73        | 5       | 0                       | convexity       | homozy. del     | mal               | N/A                  |
| MNG_18 | Anaplastic meningioma (WHO grade III) | 3         | M   | 63        | 10      | 1                       | convexity       | homozy. del     | mal               | N/A                  |
| MNG_19 | Atypical meningioma (WHO grade II)    | 2         | F   | 63        | 2       | 1                       | convexity       | homozy. del     | int               | N/A                  |
| MNG_20 | Anaplastic meningioma (WHO grade III) | 3         | F   | 60        | 3       | 0                       | convexity       | homozy. del     | mal               | N/A                  |
| MNG_21 | Atypical meningioma (WHO grade II)    | 2         | F   | 50        | 101     | 1                       | basal           | homozy. del     | int               | C250T                |
| MNG_22 | Atypical meningioma (WHO grade II)    | 2         | F   | 36        | 8       | 1                       | basal           | homozy. del     | mal               | wt                   |
| MNG_23 | Atypical meningioma (WHO grade II)    | 2         | M   | N/A       | 8       | 1                       | convexity       | homozy. del     | mal               | C228T                |
| MNG_24 | Anaplastic meningioma (WHO grade III) | 3         | F   | 70        | 10      | 1                       | convexity       | homozy. del     | mal               | C228T                |
| MNG_25 | Anaplastic meningioma (WHO grade III) | 3         | F   | 83        | 1       | 0                       | convexity       | homozy. del     | mal               | wt                   |
| MNG_26 | Anaplastic meningioma (WHO grade III) | 3         | M   | 48        | 7       | 1                       | convexity       | homozy. del     | mal               | wt                   |
| MNG_27 | Fibroblastic meningioma (WHO Grade I) | 1         | F   | 63        | 12      | 0                       | supratentorial  |                 | ben               | wt                   |
| MNG_28 | Atypical meningioma (WHO grade II)    | 2         | F   | 59        | 106     | 0                       | convexity       |                 | int               | wt                   |
| MNG_29 | Chordoid meningioma (WHO grade II)    | 2         | F   | 41        | 20      | 1                       | convexity       |                 | int               | wt                   |
| MNG_30 | Chordoid meningioma (WHO grade II)    | 2         | M   | 63        | 29      | 0                       | basal           |                 | ben               | wt                   |
| MNG_31 | Chordoid meningioma (WHO grade II)    | 2         | F   | 51        | 3       | 0                       | basal           |                 | ben               | N/A                  |
| MNG_32 | Chordoid meningioma (WHO grade II)    | 2         | F   | 51        | 19      | 1                       | convexity       |                 | int               | wt                   |
| MNG_33 | Chordoid meningioma (WHO grade II)    | 2         | F   | 58        | 77      | 1                       | supratentorial  |                 | int               | wt                   |
| MNG_34 | Chordoid meningioma (WHO grade II)    | 2         | F   | 47        | 96      | 0                       | convexity       |                 | ben               | wt                   |
| MNG_35 | Transitional meningioma (WHO Grade I) | 1         | M   | 38        | 59      | 0                       | convexity       |                 | int               | wt                   |

|        |                                       |   |   |    |     |   |                 |  |     |     |
|--------|---------------------------------------|---|---|----|-----|---|-----------------|--|-----|-----|
| MNG_36 | Metaplastic meningioma (WHO Grade I)  | 1 | M | 79 | 34  | 0 | convexity       |  | ben | wt  |
| MNG_37 | Transitional meningioma (WHO Grade I) | 1 | F | 59 | 36  | 0 | basal           |  | ben | wt  |
| MNG_38 | Transitional meningioma (WHO Grade I) | 1 | F | 47 | 1   | 0 | spinal          |  | ben | wt  |
| MNG_39 | Transitional meningioma (WHO Grade I) | 1 | F | 75 | 3   | 0 | spinal          |  | int | wt  |
| MNG_40 | Anaplastic meningioma (WHO grade III) | 3 | F | 79 | 34  | 0 | convexity       |  | int | wt  |
| MNG_41 | Transitional meningioma (WHO Grade I) | 1 | F | 15 | 46  | 0 | basal           |  | ben | N/A |
| MNG_42 | Secretory meningioma (WHO grade I)    | 1 | F | 55 | 17  | 0 | supratentorial  |  | ben | wt  |
| MNG_43 | Atypical meningioma (WHO grade II)    | 2 | F | 33 | 15  | 1 | posterior fossa |  | mal | wt  |
| MNG_44 | Angiomatous meningioma (WHO Grade I)  | 1 | F | 67 | 39  | 0 | supratentorial  |  | ben | wt  |
| MNG_45 | Atypical meningioma (WHO grade II)    | 2 | F | 44 | 92  | 0 | convexity       |  | int | N/A |
| MNG_46 | Atypical meningioma (WHO grade II)    | 2 | F | 64 | 102 | 0 | supratentorial  |  | int | wt  |
| MNG_47 | Transitional meningioma (WHO Grade I) | 1 | M | 16 | 68  | 0 | spinal          |  | ben | N/A |
| MNG_48 | Atypical meningioma (WHO grade II)    | 2 | M | 65 | 9   | 1 | convexity       |  | int | wt  |
| MNG_49 | Atypical meningioma (WHO grade II)    | 2 | F | 53 | 43  | 1 | convexity       |  | ben | wt  |
| MNG_50 | Atypical meningioma (WHO grade II)    | 2 | F | 35 | 71  | 1 | basal           |  | int | wt  |
| MNG_51 | Atypical meningioma (WHO grade II)    | 2 | M | 56 | 60  | 1 | convexity       |  | int | wt  |
| MNG_52 | Atypical meningioma (WHO grade II)    | 2 | F | 58 | 26  | 1 | convexity       |  | mal | wt  |
| MNG_53 | Atypical meningioma (WHO grade II)    | 2 | M | 56 | 3   | 1 | convexity       |  | int | wt  |
| MNG_54 | Atypical meningioma (WHO grade II)    | 2 | M | 74 | 35  | 1 | convexity       |  | int | wt  |
| MNG_55 | Atypical meningioma (WHO grade II)    | 2 | F | 68 | 31  | 1 | convexity       |  | int | wt  |
| MNG_56 | Atypical meningioma (WHO grade II)    | 2 | M | 36 | 31  | 1 | convexity       |  | int | wt  |
| MNG_57 | Fibroblastic meningioma (WHO Grade I) | 1 | F | 53 | 100 | 0 | N/A             |  | int | wt  |
| MNG_58 | Atypical meningioma (WHO grade II)    | 2 | F | 54 | 100 | 0 | N/A             |  | int | wt  |
| MNG_59 | Atypical meningioma (WHO grade II)    | 2 | F | 62 | 18  | 1 | convexity       |  | int | wt  |
| MNG_60 | Atypical meningioma (WHO grade II)    | 2 | F | 48 | 100 | 0 | convexity       |  | ben | wt  |
| MNG_61 | Atypical meningioma (WHO grade II)    | 2 | M | 48 | 100 | 0 | N/A             |  | int | wt  |
| MNG_62 | Atypical meningioma (WHO grade II)    | 2 | M | 36 | 65  | 1 | convexity       |  | int | wt  |
| MNG_63 | Atypical meningioma (WHO grade II)    | 2 | M | 63 | 33  | 1 | convexity       |  | int | wt  |
| MNG_64 | Atypical meningioma (WHO grade II)    | 2 | M | 64 | 3   | 1 | convexity       |  | int | wt  |
| MNG_65 | Atypical meningioma (WHO grade II)    | 2 | M | 64 | 67  | 1 | convexity       |  | int | wt  |
| MNG_66 | Chordoid meningioma (WHO grade II)    | 2 | F | 63 | 35  | 1 | convexity       |  | int | wt  |
| MNG_67 | Transitional meningioma (WHO Grade I) | 1 | F | 69 | 18  | 1 | convexity       |  | int | wt  |
| MNG_68 | Atypical meningioma (WHO grade II)    | 2 | F | 58 | 62  | 1 | convexity       |  | int | wt  |
| MNG_69 | Atypical meningioma (WHO grade II)    | 2 | F | 45 | 25  | 1 | convexity       |  | int | wt  |
| MNG_70 | Atypical meningioma (WHO grade II)    | 2 | M | 65 | 9   | 1 | convexity       |  | int | wt  |
| MNG_71 | Anaplastic meningioma (WHO grade III) | 3 | F | 66 | 4   | 1 | convexity       |  | mal | wt  |
| MNG_72 | Transitional meningioma (WHO Grade I) | 1 | F | 55 | 36  | 1 | basal           |  | ben | wt  |
| MNG_73 | Anaplastic meningioma (WHO grade III) | 3 | F | 33 | 96  | 1 | convexity       |  | int | wt  |

|         |                                         |   |   |     |     |   |                 |  |     |     |
|---------|-----------------------------------------|---|---|-----|-----|---|-----------------|--|-----|-----|
| MNG_74  | Metaplastic meningioma (WHO Grade I)    | 1 | M | 53  | 120 | 0 | convexity       |  | ben | wt  |
| MNG_75  | Atypical meningioma (WHO grade II)      | 2 | F | 37  | 170 | 0 | convexity       |  | ben | wt  |
| MNG_76  | Fibroblastic meningioma (WHO Grade I)   | 1 | F | 45  | 137 | 0 | convexity       |  | ben | wt  |
| MNG_77  | Secretory meningioma (WHO grade I)      | 1 | M | 51  | 145 | 0 | basal           |  | ben | wt  |
| MNG_78  | Transitional meningioma (WHO Grade I)   | 1 | F | 62  | 85  | 0 | posterior fossa |  | ben | wt  |
| MNG_79  | Angiomatous meningioma (WHO Grade I)    | 1 | M | 54  | 126 | 0 | basal           |  | ben | wt  |
| MNG_80  | Secretory meningioma (WHO grade I)      | 1 | F | 57  | 130 | 0 | basal           |  | ben | wt  |
| MNG_81  | Atypical meningioma (WHO grade II)      | 2 | F | 58  | 147 | 1 | convexity       |  | ben | wt  |
| MNG_82  | Fibroblastic meningioma (WHO Grade I)   | 1 | F | 44  | 3   | 1 | convexity       |  | int | wt  |
| MNG_83  | Atypical meningioma (WHO grade II)      | 2 | F | 16  | 22  | 1 | basal           |  | int | wt  |
| MNG_84  | Atypical meningioma (WHO grade II)      | 2 | F | 41  | 108 | 0 | convexity       |  | int | wt  |
| MNG_85  | Fibroblastic meningioma (WHO Grade I)   | 1 | F | 63  | 73  | 0 | basal           |  | ben | wt  |
| MNG_86  | Chordoid meningioma (WHO grade II)      | 2 | F | 68  | 17  | 1 | convexity       |  | ben | wt  |
| MNG_87  | Transitional meningioma (WHO Grade I)   | 1 | F | N/A | 96  | 0 | basal           |  | ben | wt  |
| MNG_88  | Transitional meningioma (WHO Grade I)   | 1 | M | 47  | 39  | 1 | basal           |  | int | N/A |
| MNG_89  | Transitional meningioma (WHO Grade I)   | 1 | F | 51  | 103 | 0 | supratentorial  |  | ben | wt  |
| MNG_90  | Fibroblastic meningioma (WHO Grade I)   | 1 | F | 59  | 115 | 0 | convexity       |  | ben | wt  |
| MNG_91  | Atypical meningioma (WHO grade II)      | 2 | F | 49  | 12  | 0 | convexity       |  | int | wt  |
| MNG_92  | Transitional meningioma (WHO Grade I)   | 1 | F | 64  | 110 | 0 | convexity       |  | int | wt  |
| MNG_93  | Secretory meningioma (WHO grade I)      | 1 | M | 49  | 78  | 0 | convexity       |  | ben | wt  |
| MNG_94  | Transitional meningioma (WHO Grade I)   | 1 | F | N/A | 33  | 1 | convexity       |  | int | wt  |
| MNG_95  | Transitional meningioma (WHO Grade I)   | 1 | F | N/A | 20  | 1 | basal           |  | ben | wt  |
| MNG_96  | Fibroblastic meningioma (WHO Grade I)   | 1 | F | 44  | 50  | 0 | convexity       |  | ben | wt  |
| MNG_97  | Transitional meningioma (WHO Grade I)   | 1 | F | 59  | 85  | 1 | posterior fossa |  | ben | wt  |
| MNG_98  | Meningothelial meningioma (WHO Grade I) | 1 | F | 60  | 49  | 0 | basal           |  | ben | wt  |
| MNG_99  | Transitional meningioma (WHO Grade I)   | 1 | M | 52  | 54  | 1 | convexity       |  | int | wt  |
| MNG_100 | Meningothelial meningioma (WHO Grade I) | 1 | M | 54  | 101 | 1 | convexity       |  | int | wt  |
| MNG_101 | Transitional meningioma (WHO Grade I)   | 1 | F | N/A | 108 | 1 | convexity       |  | int | wt  |
| MNG_102 | Fibroblastic meningioma (WHO Grade I)   | 1 | M | 52  | 85  | 1 | posterior fossa |  | int | wt  |
| MNG_103 | Transitional meningioma (WHO Grade I)   | 1 | M | 71  | 111 | 0 | convexity       |  | int | wt  |
| MNG_104 | Atypical meningioma (WHO grade II)      | 2 | M | N/A | 132 | 0 | convexity       |  | int | wt  |
| MNG_105 | Atypical meningioma (WHO grade II)      | 2 | F | 83  | 107 | 0 | convexity       |  | ben | wt  |
| MNG_106 | Atypical meningioma (WHO grade II)      | 2 | F | N/A | 125 | 0 | convexity       |  | ben | wt  |
| MNG_107 | Atypical meningioma (WHO grade II)      | 2 | F | 49  | 98  | 0 | convexity       |  | ben | wt  |
| MNG_108 | Atypical meningioma (WHO grade II)      | 2 | F | N/A | 156 | 0 | convexity       |  | ben | wt  |
| MNG_109 | Anaplastic meningioma (WHO grade III)   | 3 | F | 63  | 77  | 0 | convexity       |  | ben | wt  |
| MNG_110 | Atypical meningioma (WHO grade II)      | 2 | F | N/A | 141 | 0 | convexity       |  | ben | wt  |
| MNG_111 | Atypical meningioma (WHO grade II)      | 2 | F | N/A | 120 | 0 | convexity       |  | ben | wt  |

|         |                                         |   |   |     |     |   |                 |  |     |    |
|---------|-----------------------------------------|---|---|-----|-----|---|-----------------|--|-----|----|
| MNG_112 | Atypical meningioma (WHO grade II)      | 2 | F | N/A | 24  | 1 | convexity       |  | int | wt |
| MNG_113 | Atypical meningioma (WHO grade II)      | 2 | M | N/A | 19  | 1 | convexity       |  | int | wt |
| MNG_114 | Atypical meningioma (WHO grade II)      | 2 | F | 26  | 100 | 0 | convexity       |  | ben | wt |
| MNG_115 | Atypical meningioma (WHO grade II)      | 2 | F | 54  | 14  | 1 | convexity       |  | int | wt |
| MNG_116 | Atypical meningioma (WHO grade II)      | 2 | M | 64  | 19  | 1 | posterior fossa |  | int | wt |
| MNG_117 | Atypical meningioma (WHO grade II)      | 2 | M | 71  | 23  | 1 | convexity       |  | int | wt |
| MNG_118 | Atypical meningioma (WHO grade II)      | 2 | M | 63  | 22  | 1 | convexity       |  | int | wt |
| MNG_119 | Fibroblastic meningioma (WHO Grade I)   | 1 | F | 56  | 133 | 0 | convexity       |  | ben | wt |
| MNG_120 | Anaplastic meningioma (WHO grade III)   | 3 | M | 39  | 39  | 1 | basal           |  | int | wt |
| MNG_121 | Anaplastic meningioma (WHO grade III)   | 3 | F | 58  | 50  | 1 | convexity       |  | ben | wt |
| MNG_122 | Transitional meningioma (WHO Grade I)   | 1 | M | 47  | 72  | 0 | convexity       |  | int | wt |
| MNG_123 | Transitional meningioma (WHO Grade I)   | 1 | F | 68  | 128 | 0 | basal           |  | int | wt |
| MNG_124 | Atypical meningioma (WHO grade II)      | 2 | F | 65  | 27  | 1 | basal           |  | int | wt |
| MNG_125 | Meningioma NOS                          | 1 | F | 48  | 180 | 1 | N/A             |  | ben | wt |
| MNG_126 | Meningothelial meningioma (WHO Grade I) | 1 | F | 35  | 192 | 1 | convexity       |  | ben | wt |
| MNG_127 | Atypical meningioma (WHO grade II)      | 2 | F | 39  | 24  | 1 | convexity       |  | int | wt |
| MNG_128 | Atypical meningioma (WHO grade II)      | 2 | F | 68  | 40  | 1 | convexity       |  | int | wt |
| MNG_129 | Meningothelial meningioma (WHO Grade I) | 1 | M | 36  | 19  | 0 | convexity       |  | int | wt |
| MNG_130 | Meningothelial meningioma (WHO Grade I) | 1 | F | 39  | 156 | 1 | basal           |  | ben | wt |
| MNG_131 | Atypical meningioma (WHO grade II)      | 2 | F | 71  | 39  | 1 | supratentorial  |  | int | wt |
| MNG_132 | Secretory meningioma (WHO grade I)      | 1 | F | 44  | 92  | 0 | convexity       |  | ben | wt |
| MNG_133 | Atypical meningioma (WHO grade II)      | 2 | M | 41  | 19  | 1 | convexity       |  | int | wt |
| MNG_134 | Microcystic meningioma (WHO grade I)    | 1 | F | 53  | 91  | 0 | basal           |  | ben | wt |
| MNG_135 | Microcystic meningioma (WHO grade I)    | 1 | F | 64  | 78  | 0 | convexity       |  | int | wt |
| MNG_136 | Meningioma NOS                          | 1 | F | 47  | 102 | 1 | basal           |  | ben | wt |
| MNG_137 | Anaplastic meningioma (WHO grade III)   | 3 | M | 52  | 21  | 1 | convexity       |  | int | wt |
| MNG_138 | Psammomatous meningioma (WHO grade I)   | 1 | F | 66  | 123 | 0 | posterior fossa |  | int | wt |
| MNG_139 | Atypical meningioma (WHO grade II)      | 2 | M | 68  | 68  | 0 | convexity       |  | int | wt |
| MNG_140 | Psammomatous meningioma (WHO grade I)   | 1 | F | 70  | 131 | 0 | basal           |  | ben | wt |
| MNG_141 | Fibroblastic meningioma (WHO Grade I)   | 1 | F | 56  | 129 | 0 | posterior fossa |  | ben | wt |
| MNG_142 | Anaplastic meningioma (WHO grade III)   | 3 | M | N/A | 7   | 0 | basal           |  | int | wt |
| MNG_143 | Anaplastic meningioma (WHO grade III)   | 3 | M | N/A | 29  | 1 | convexity       |  | int | wt |
| MNG_144 | Atypical meningioma (WHO grade II)      | 2 | M | 79  | 89  | 0 | convexity       |  | int | wt |
| MNG_145 | Meningothelial meningioma (WHO Grade I) | 1 | M | 52  | 60  | 1 | convexity       |  | int | wt |
| MNG_146 | Atypical meningioma (WHO grade II)      | 2 | F | 35  | 8   | 1 | convexity       |  | mal | wt |
| MNG_147 | Angiomatous meningioma (WHO Grade I)    | 1 | M | 43  | 138 | 0 | convexity       |  | ben | wt |
| MNG_148 | Atypical meningioma (WHO grade II)      | 2 | M | 60  | 84  | 1 | basal           |  | int | wt |
| MNG_149 | Atypical meningioma (WHO grade II)      | 2 | M | 13  | 3   | 1 | convexity       |  | int | wt |

|         |                                         |   |   |    |     |   |                 |  |     |     |
|---------|-----------------------------------------|---|---|----|-----|---|-----------------|--|-----|-----|
| MNG_150 | Meningioma NOS                          | 2 | F | 57 | 106 | 0 | posterior fossa |  | ben | wt  |
| MNG_151 | Microcystic meningioma (WHO grade I)    | 1 | M | 63 | 108 | 0 | basal           |  | ben | wt  |
| MNG_152 | Meningioma NOS                          | 2 | M | 44 | 52  | 1 | N/A             |  | mal | wt  |
| MNG_153 | Anaplastic meningioma (WHO grade III)   | 3 | F | 62 | 18  | 1 | convexity       |  | mal | wt  |
| MNG_154 | Meningioma NOS                          | 2 | F | 60 | 27  | 0 | posterior fossa |  | ben | wt  |
| MNG_155 | Psammomatous meningioma (WHO grade I)   | 1 | M | 61 | 111 | 0 | convexity       |  | ben | wt  |
| MNG_156 | Secretory meningioma (WHO grade I)      | 1 | F | 75 | 123 | 0 | basal           |  | ben | wt  |
| MNG_157 | Meningioma NOS                          | 2 | M | 72 | 99  | 0 | convexity       |  | int | wt  |
| MNG_158 | Meningioma NOS                          | 2 | F | 64 | 126 | 0 | convexity       |  | int | wt  |
| MNG_159 | Meningioma NOS                          | 2 | F | 50 | 95  | 0 | basal           |  | ben | wt  |
| MNG_160 | Meningioma NOS                          | 2 | M | 77 | 111 | 0 | posterior fossa |  | int | wt  |
| MNG_161 | Psammomatous meningioma (WHO grade I)   | 1 | F | 70 | 143 | 0 | posterior fossa |  | ben | wt  |
| MNG_162 | Psammomatous meningioma (WHO grade I)   | 1 | F | 61 | 125 | 0 | basal           |  | int | wt  |
| MNG_163 | Atypical meningioma (WHO grade II)      | 2 | M | 66 | 24  | 1 | convexity       |  | int | wt  |
| MNG_164 | Angiomatous meningioma (WHO Grade I)    | 1 | F | 42 | 146 | 0 | convexity       |  | ben | wt  |
| MNG_165 | Chordoid meningioma (WHO grade II)      | 2 | F | 76 | 39  | 0 | convexity       |  | int | wt  |
| MNG_166 | Fibroblastic meningioma (WHO Grade I)   | 1 | F | 42 | 132 | 0 | convexity       |  | ben | wt  |
| MNG_167 | Angiomatous meningioma (WHO Grade I)    | 1 | M | 38 | 166 | 0 | convexity       |  | ben | wt  |
| MNG_168 | Fibroblastic meningioma (WHO Grade I)   | 1 | F | 72 | 39  | 0 | convexity       |  | ben | wt  |
| MNG_169 | Anaplastic meningioma (WHO grade III)   | 3 | M | 38 | 27  | 1 | basal           |  | int | wt  |
| MNG_170 | Atypical meningioma (WHO grade II)      | 2 | F | 66 | 39  | 0 | posterior fossa |  | int | wt  |
| MNG_171 | Meningioma NOS                          | 2 | M | 39 | 48  | 1 | N/A             |  | int | wt  |
| MNG_172 | Anaplastic meningioma (WHO grade III)   | 3 | F | 79 | 2   | 1 | N/A             |  | mal | wt  |
| MNG_173 | Meningothelial meningioma (WHO Grade I) | 1 | F | 77 | 17  | 0 | supratentorial  |  | int | wt  |
| MNG_174 | Anaplastic meningioma (WHO grade III)   | 3 | F | 57 | 3   | 1 | convexity       |  | mal | wt  |
| MNG_175 | Angiomatous meningioma (WHO Grade I)    | 1 | F | 53 | 89  | 0 | convexity       |  | ben | wt  |
| MNG_176 | Atypical meningioma (WHO grade II)      | 2 | F | 33 | 28  | 1 | convexity       |  | ben | wt  |
| MNG_177 | Anaplastic meningioma (WHO grade III)   | 3 | M | 78 | 64  | 1 | convexity       |  | int | wt  |
| MNG_178 | Atypical meningioma (WHO grade II)      | 2 | M | 67 | 66  | 0 | convexity       |  | int | wt  |
| MNG_179 | Chordoid meningioma (WHO grade II)      | 2 | F | 52 | 100 | 0 | convexity       |  | ben | wt  |
| MNG_180 | Meningioma NOS                          | 1 | M | 54 | 35  | 0 | basal           |  | ben | N/A |
| MNG_181 | Atypical meningioma (WHO grade II)      | 2 | F | 30 | 2   | 1 | convexity       |  | int | wt  |
| MNG_182 | Meningioma NOS                          | 2 | M | 61 | 98  | 1 | convexity       |  | int | wt  |
| MNG_183 | Microcystic meningioma (WHO grade I)    | 1 | F | 36 | 40  | 0 | convexity       |  | ben | wt  |
| MNG_184 | Transitional meningioma (WHO Grade I)   | 1 | M | 46 | 35  | 0 | basal           |  | int | N/A |
| MNG_185 | Secretory meningioma (WHO grade I)      | 1 | F | 58 | 1   | 0 | basal           |  | ben | N/A |
| MNG_186 | Secretory meningioma (WHO grade I)      | 1 | F | 39 | 48  | 0 | convexity       |  | ben | N/A |
| MNG_187 | Psammomatous meningioma (WHO grade I)   | 1 | F | 52 | 29  | 1 | spinal          |  | int | N/A |

|         |                                       |   |   |    |     |   |                 |  |     |     |
|---------|---------------------------------------|---|---|----|-----|---|-----------------|--|-----|-----|
| MNG_188 | Anaplastic meningioma (WHO grade III) | 3 | M | 83 | 13  | 1 | convexity       |  | int | N/A |
| MNG_189 | Microcystic meningioma (WHO grade I)  | 1 | M | 42 | 104 | 0 | N/A             |  | ben | N/A |
| MNG_190 | Atypical meningioma (WHO grade II)    | 2 | M | 59 | 38  | 0 | convexity       |  | int | N/A |
| MNG_191 | Chordoid meningioma (WHO grade II)    | 2 | F | 50 | 28  | 1 | convexity       |  | mal | N/A |
| MNG_192 | Psammomatous meningioma (WHO grade I) | 1 | F | 67 | 28  | 0 | convexity       |  | ben | N/A |
| MNG_193 | Psammomatous meningioma (WHO grade I) | 1 | M | 64 | 13  | 0 | spinal          |  | ben | N/A |
| MNG_194 | Secretory meningioma (WHO grade I)    | 1 | F | 51 | 32  | 0 | posterior fossa |  | ben | N/A |
| MNG_195 | Secretory meningioma (WHO grade I)    | 1 | F | 57 | 109 | 0 | basal           |  | ben | N/A |
| MNG_196 | Psammomatous meningioma (WHO grade I) | 1 | F | 43 | 45  | 0 | basal           |  | ben | N/A |
| MNG_197 | Psammomatous meningioma (WHO grade I) | 1 | F | 80 | 2   | 0 | spinal          |  | ben | N/A |
| MNG_198 | Psammomatous meningioma (WHO grade I) | 1 | F | 67 | 50  | 0 | basal           |  | int | N/A |
| MNG_199 | Anaplastic meningioma (WHO grade III) | 3 | M | 64 | 3   | 0 | basal           |  | ben | N/A |
| MNG_200 | Atypical meningioma (WHO grade II)    | 2 | F | 64 | 85  | 1 | basal           |  | int | N/A |
| MNG_201 | Atypical meningioma (WHO grade II)    | 2 | M | 56 | 16  | 1 | convexity       |  | int | N/A |
| MNG_202 | Secretory meningioma (WHO grade I)    | 1 | F | 66 | 40  | 0 | convexity       |  | ben | N/A |
| MNG_203 | Secretory meningioma (WHO grade I)    | 1 | F | 51 | 15  | 0 | basal           |  | ben | N/A |
| MNG_204 | Secretory meningioma (WHO grade I)    | 1 | F | 57 | 41  | 0 | convexity       |  | ben | N/A |
| MNG_205 | Psammomatous meningioma (WHO grade I) | 1 | F | 55 | 2   | 0 | basal           |  | ben | N/A |
| MNG_206 | Psammomatous meningioma (WHO grade I) | 1 | F | 73 | 2   | 0 | spinal          |  | int | N/A |
| MNG_207 | Anaplastic meningioma (WHO grade III) | 3 | F | 64 | 36  | 0 | posterior fossa |  | ben | N/A |
| MNG_208 | Atypical meningioma (WHO grade II)    | 2 | M | 50 | 26  | 0 | convexity       |  | int | N/A |
| MNG_209 | Atypical meningioma (WHO grade II)    | 2 | F | 76 | 3   | 0 | convexity       |  | ben | N/A |
| MNG_210 | Atypical meningioma (WHO grade II)    | 2 | F | 45 | 7   | 0 | convexity       |  | int | N/A |
| MNG_211 | Atypical meningioma (WHO grade II)    | 2 | F | 69 | 8   | 0 | convexity       |  | int | N/A |
| MNG_212 | Psammomatous meningioma (WHO grade I) | 1 | M | 20 | 19  | 1 | spinal          |  | int | N/A |
| MNG_213 | Anaplastic meningioma (WHO grade III) | 3 | F | 64 | 61  | 0 | convexity       |  | int | N/A |
| MNG_214 | Atypical meningioma (WHO grade II)    | 2 | M | 52 | 9   | 0 | posterior fossa |  | ben | N/A |
| MNG_215 | Chordoid meningioma (WHO grade II)    | 2 | F | 55 | 26  | 0 | N/A             |  | ben | N/A |
| MNG_216 | Anaplastic meningioma (WHO grade III) | 3 | M | 68 | 5   | 1 | N/A             |  | mal | N/A |
| MNG_217 | Atypical meningioma (WHO grade II)    | 2 | M | 61 | 73  | 0 | convexity       |  | int | N/A |
| MNG_218 | Secretory meningioma (WHO grade I)    | 1 | F | 38 | 29  | 0 | basal           |  | ben | N/A |
| MNG_219 | Meningioma NOS                        | 1 | M | 62 | 6   | 0 | convexity       |  | ben | N/A |
| MNG_220 | Psammomatous meningioma (WHO grade I) | 1 | F | 48 | 22  | 1 | spinal          |  | int | N/A |
| MNG_221 | Psammomatous meningioma (WHO grade I) | 1 | F | 63 | 17  | 0 | spinal          |  | ben | N/A |
| MNG_222 | Anaplastic meningioma (WHO grade III) | 3 | M | 61 | 32  | 0 | convexity       |  | int | N/A |
| MNG_223 | Anaplastic meningioma (WHO grade III) | 3 | M | 66 | 15  | 1 | convexity       |  | mal | N/A |
| MNG_224 | Chordoid meningioma (WHO grade II)    | 2 | F | 47 | 61  | 0 | convexity       |  | ben | N/A |
| MNG_225 | Chordoid meningioma (WHO grade II)    | 2 | F | 51 | 16  | 0 | convexity       |  | ben | N/A |



|         |                                       |   |   |    |    |   |                 |  |     |     |
|---------|---------------------------------------|---|---|----|----|---|-----------------|--|-----|-----|
| MNG_226 | Chordoid meningioma (WHO grade II)    | 2 | F | 52 | 69 | 0 | basal           |  | ben | N/A |
| MNG_227 | Meningioma NOS                        | 1 | F | 48 | 1  | 0 | convexity       |  | ben | N/A |
| MNG_228 | Anaplastic meningioma (WHO grade III) | 3 | F | 68 | 1  | 1 | basal           |  | mal | N/A |
| MNG_229 | Secretory meningioma (WHO grade I)    | 1 | F | 67 | 42 | 0 | basal           |  | ben | N/A |
| MNG_230 | Atypical meningioma (WHO grade II)    | 2 | M | 6  | 71 | 0 | N/A             |  | ben | N/A |
| MNG_231 | Atypical meningioma (WHO grade II)    | 2 | F | 69 | 41 | 1 | convexity       |  | int | N/A |
| MNG_232 | Atypical meningioma (WHO grade II)    | 2 | M | 43 | 4  | 0 | basal           |  | ben | N/A |
| MNG_233 | Microcystic meningioma (WHO grade I)  | 1 | F | 47 | 23 | 1 | basal           |  | ben | N/A |
| MNG_234 | Microcystic meningioma (WHO grade I)  | 1 | F | 49 | 44 | 1 | basal           |  | ben | N/A |
| MNG_235 | Chordoid meningioma (WHO grade II)    | 2 | F | 51 | 30 | 0 | basal           |  | ben | N/A |
| MNG_236 | Microcystic meningioma (WHO grade I)  | 1 | F | 39 | 5  | 1 | N/A             |  | ben | N/A |
| MNG_237 | Anaplastic meningioma (WHO grade III) | 3 | F | 63 | 32 | 1 | convexity       |  | int | N/A |
| MNG_238 | Atypical meningioma (WHO grade II)    | 2 | M | 72 | 62 | 0 | convexity       |  | int | N/A |
| MNG_239 | Atypical meningioma (WHO grade II)    | 2 | F | 59 | 24 | 1 | convexity       |  | int | N/A |
| MNG_240 | Chordoid meningioma (WHO grade II)    | 2 | F | 42 | 2  | 0 | convexity       |  | ben | N/A |
| MNG_241 | Atypical meningioma (WHO grade II)    | 2 | F | 56 | 22 | 0 | convexity       |  | ben | N/A |
| MNG_242 | Atypical meningioma (WHO grade II)    | 2 | M | 62 | 22 | 1 | convexity       |  | ben | N/A |
| MNG_243 | Secretory meningioma (WHO grade I)    | 1 | F | 64 | 4  | 0 | convexity       |  | ben | N/A |
| MNG_244 | Anaplastic meningioma (WHO grade III) | 3 | M | 61 | 5  | 1 | convexity       |  | mal | N/A |
| MNG_245 | Chordoid meningioma (WHO grade II)    | 2 | F | 49 | 29 | 0 | N/A             |  | ben | N/A |
| MNG_246 | Chordoid meningioma (WHO grade II)    | 2 | F | 49 | 27 | 0 | N/A             |  | ben | N/A |
| MNG_247 | Atypical meningioma (WHO grade II)    | 2 | F | 72 | 20 | 1 | convexity       |  | mal | N/A |
| MNG_248 | Anaplastic meningioma (WHO grade III) | 3 | F | 61 | 34 | 1 | convexity       |  | mal | N/A |
| MNG_249 | Atypical meningioma (WHO grade II)    | 2 | M | 50 | 53 | 0 | basal           |  | int | N/A |
| MNG_250 | Atypical meningioma (WHO grade II)    | 2 | F | 60 | 22 | 1 | N/A             |  | int | N/A |
| MNG_251 | Secretory meningioma (WHO grade I)    | 1 | F | 78 | 27 | 0 | basal           |  | ben | N/A |
| MNG_252 | Atypical meningioma (WHO grade II)    | 2 | M | 72 | 10 | 1 | N/A             |  | ben | N/A |
| MNG_253 | Atypical meningioma (WHO grade II)    | 2 | M | 80 | 1  | 0 | convexity       |  | int | N/A |
| MNG_254 | Atypical meningioma (WHO grade II)    | 2 | F | 60 | 86 | 0 | N/A             |  | ben | N/A |
| MNG_255 | Anaplastic meningioma (WHO grade III) | 3 | F | 53 | 13 | 1 | basal           |  | mal | N/A |
| MNG_256 | Atypical meningioma (WHO grade II)    | 2 | F | 19 | 97 | 0 | convexity       |  | ben | N/A |
| MNG_257 | Anaplastic meningioma (WHO grade III) | 3 | M | 32 | 1  | 0 | convexity       |  | ben | N/A |
| MNG_258 | Anaplastic meningioma (WHO grade III) | 3 | F | 70 | 84 | 0 | convexity       |  | ben | N/A |
| MNG_259 | Secretory meningioma (WHO grade I)    | 1 | F | 73 | 9  | 0 | posterior fossa |  | ben | N/A |
| MNG_260 | Psammomatous meningioma (WHO grade I) | 1 | F | 67 | 6  | 0 | spinal          |  | int | N/A |
| MNG_261 | Anaplastic meningioma (WHO grade III) | 3 | F | 42 | 32 | 0 | convexity       |  | ben | N/A |
| MNG_262 | Secretory meningioma (WHO grade I)    | 1 | F | 40 | 45 | 0 | basal           |  | ben | N/A |
| MNG_263 | Atypical meningioma (WHO grade II)    | 2 | F | 45 | 59 | 0 | convexity       |  | ben | N/A |

|         |                                       |   |   |     |    |   |                 |  |     |     |
|---------|---------------------------------------|---|---|-----|----|---|-----------------|--|-----|-----|
| MNG_264 | Secretory meningioma (WHO grade I)    | 1 | F | 51  | 18 | 0 | basal           |  | ben | N/A |
| MNG_265 | Atypical meningioma (WHO grade II)    | 2 | F | 38  | 3  | 0 | basal           |  | ben | N/A |
| MNG_266 | Secretory meningioma (WHO grade I)    | 1 | F | 65  | 84 | 1 | basal           |  | ben | N/A |
| MNG_267 | Anaplastic meningioma (WHO grade III) | 3 | F | 65  | 39 | 0 | posterior fossa |  | int | N/A |
| MNG_268 | Meningioma NOS                        | 1 | F | N/A | 31 | 1 | supratentorial  |  | int | N/A |
| MNG_269 | Chordoid meningioma (WHO grade II)    | 2 | F | 42  | 31 | 1 | basal           |  | ben | N/A |
| MNG_270 | Meningioma NOS                        | 1 | F | 58  | 26 | 0 | convexity       |  | ben | N/A |
| MNG_271 | Transitional meningioma (WHO Grade I) | 1 | M | 47  | 25 | 0 | convexity       |  | ben | N/A |
| MNG_272 | Atypical meningioma (WHO grade II)    | 2 | M | 47  | 5  | 1 | supratentorial  |  | int | N/A |
| MNG_273 | Meningioma NOS                        | 1 | F | 54  | 29 | 0 | convexity       |  | ben | N/A |
| MNG_274 | Transitional meningioma (WHO Grade I) | 1 | F | 60  | 19 | 0 | spinal          |  | int | N/A |
| MNG_275 | Meningioma NOS                        | 1 | F | 61  | 5  | 0 | convexity       |  | int | N/A |
| MNG_276 | Secretory meningioma (WHO grade I)    | 1 | F | 77  | 12 | 1 | basal           |  | ben | N/A |
| MNG_277 | Atypical meningioma (WHO grade II)    | 2 | F | 65  | 3  | 0 | basal           |  | ben | N/A |
| MNG_278 | Atypical meningioma (WHO grade II)    | 2 | F | 64  | 31 | 0 | posterior fossa |  | ben | N/A |
| MNG_279 | Meningioma NOS                        | 1 | M | 76  | 21 | 0 | convexity       |  | ben | N/A |
| MNG_280 | Transitional meningioma (WHO Grade I) | 1 | F | 80  | 2  | 0 | supratentorial  |  | int | N/A |
| MNG_281 | Transitional meningioma (WHO Grade I) | 1 | M | 39  | 27 | 0 | convexity       |  | int | N/A |
| MNG_282 | Atypical meningioma (WHO grade II)    | 2 | M | 39  | 27 | 0 | convexity       |  | int | N/A |
| MNG_283 | Atypical meningioma (WHO grade II)    | 2 | M | 73  | 29 | 0 | convexity       |  | int | N/A |
| MNG_284 | Meningioma NOS                        | 1 | M | 57  | 18 | 1 | posterior fossa |  | int | N/A |
| MNG_285 | Atypical meningioma (WHO grade II)    | 2 | F | 61  | 24 | 1 | convexity       |  | int | N/A |
| MNG_286 | Transitional meningioma (WHO Grade I) | 1 | F | 67  | 30 | 0 | convexity       |  | int | N/A |
| MNG_287 | Meningioma NOS                        | 1 | F | 50  | 1  | 0 | convexity       |  | ben | N/A |
| MNG_288 | Meningioma NOS                        | 1 | F | 44  | 3  | 0 | posterior fossa |  | ben | N/A |
| MNG_289 | Transitional meningioma (WHO Grade I) | 1 | M | 71  | 20 | 0 | convexity       |  | int | N/A |
| MNG_290 | Atypical meningioma (WHO grade II)    | 2 | M | 34  | 12 | 0 | N/A             |  | ben | N/A |
| MNG_291 | Atypical meningioma (WHO grade II)    | 2 | F | 36  | 6  | 0 | basal           |  | ben | N/A |
| MNG_292 | Meningioma NOS                        | 1 | F | 50  | 26 | 0 | convexity       |  | int | N/A |
| MNG_293 | Meningioma NOS                        | 1 | M | 60  | 4  | 0 | convexity       |  | int | N/A |
| MNG_294 | Transitional meningioma (WHO Grade I) | 1 | F | 54  | 15 | 0 | supratentorial  |  | ben | N/A |
| MNG_295 | Meningioma NOS                        | 1 | M | 69  | 24 | 0 | convexity       |  | int | N/A |
| MNG_296 | Meningioma NOS                        | 1 | M | 63  | 16 | 0 | posterior fossa |  | ben | N/A |
| MNG_297 | Atypical meningioma (WHO grade II)    | 2 | M | 65  | 7  | 1 | convexity       |  | int | N/A |
| MNG_298 | Anaplastic meningioma (WHO grade III) | 3 | F | 61  | 4  | 1 | convexity       |  | mal | N/A |
| MNG_299 | Atypical meningioma (WHO grade II)    | 2 | F | 77  | 11 | 0 | posterior fossa |  | ben | N/A |
| MNG_300 | Meningioma NOS                        | 1 | M | 57  | 10 | 0 | basal           |  | ben | N/A |
| MNG_301 | Secretory meningioma (WHO grade I)    | 1 | F | 78  | 2  | 0 | convexity       |  | ben | N/A |

|         |                                       |   |   |    |    |   |                 |  |     |     |
|---------|---------------------------------------|---|---|----|----|---|-----------------|--|-----|-----|
| MNG_302 | Atypical meningioma (WHO grade II)    | 2 | F | 58 | 24 | 1 | convexity       |  | int | N/A |
| MNG_303 | Transitional meningioma (WHO Grade I) | 1 | F | 43 | 7  | 0 | supratentorial  |  | ben | N/A |
| MNG_304 | Transitional meningioma (WHO Grade I) | 1 | M | 36 | 20 | 0 | supratentorial  |  | ben | N/A |
| MNG_305 | Atypical meningioma (WHO grade II)    | 2 | F | 40 | 13 | 0 | convexity       |  | ben | N/A |
| MNG_306 | Meningioma NOS                        | 1 | M | 64 | 11 | 0 | basal           |  | ben | N/A |
| MNG_307 | Atypical meningioma (WHO grade II)    | 2 | F | 84 | 8  | 1 | convexity       |  | int | N/A |
| MNG_308 | Atypical meningioma (WHO grade II)    | 2 | F | 68 | 26 | 0 | convexity       |  | ben | N/A |
| MNG_309 | Atypical meningioma (WHO grade II)    | 2 | F | 41 | 24 | 0 | convexity       |  | int | N/A |
| MNG_310 | Transitional meningioma (WHO Grade I) | 1 | F | 55 | 10 | 0 | convexity       |  | ben | N/A |
| MNG_311 | Atypical meningioma (WHO grade II)    | 2 | F | 56 | 18 | 0 | convexity       |  | int | N/A |
| MNG_312 | Atypical meningioma (WHO grade II)    | 2 | F | 48 | 20 | 0 | convexity       |  | ben | N/A |
| MNG_313 | Atypical meningioma (WHO grade II)    | 2 | M | 69 | 8  | 1 | convexity       |  | int | N/A |
| MNG_314 | Atypical meningioma (WHO grade II)    | 2 | M | 82 | 1  | 0 | posterior fossa |  | ben | N/A |
| MNG_315 | Atypical meningioma (WHO grade II)    | 2 | M | 56 | 18 | 0 | supratentorial  |  | int | N/A |
| MNG_316 | Atypical meningioma (WHO grade II)    | 2 | F | 70 | 17 | 0 | convexity       |  | int | N/A |
| MNG_317 | Transitional meningioma (WHO Grade I) | 1 | M | 72 | 1  | 0 | convexity       |  | int | N/A |
| MNG_318 | Anaplastic meningioma (WHO grade III) | 3 | F | 85 | 2  | 0 | supratentorial  |  | mal | N/A |
| MNG_319 | Meningioma NOS                        | 1 | F | 78 | 15 | 0 | convexity       |  | mal | N/A |
| MNG_320 | Atypical meningioma (WHO grade II)    | 2 | F | 60 | 13 | 0 | convexity       |  | ben | N/A |
| MNG_321 | Transitional meningioma (WHO Grade I) | 1 | M | 44 | 20 | 1 | convexity       |  | int | N/A |
| MNG_322 | Atypical meningioma (WHO grade II)    | 2 | M | 67 | 16 | 1 | convexity       |  | int | N/A |
| MNG_323 | Atypical meningioma (WHO grade II)    | 2 | M | 78 | 26 | 0 | convexity       |  | ben | N/A |
| MNG_324 | Atypical meningioma (WHO grade II)    | 2 | M | 21 | 22 | 0 | convexity       |  | mal | N/A |
| MNG_325 | Atypical meningioma (WHO grade II)    | 2 | F | 68 | 7  | 0 | convexity       |  | int | N/A |
| MNG_326 | Meningioma NOS                        | 1 | F | 41 | 16 | 0 | basal           |  | ben | N/A |
| MNG_327 | Meningioma NOS                        | 1 | M | 68 | 15 | 0 | convexity       |  | ben | N/A |
| MNG_328 | Meningioma NOS                        | 1 | F | 47 | 15 | 0 | basal           |  | ben | N/A |
| MNG_329 | Meningioma NOS                        | 1 | M | 59 | 16 | 0 | spinal          |  | int | N/A |
| MNG_330 | Meningioma NOS                        | 1 | F | 45 | 14 | 0 | spinal          |  | int | N/A |
| MNG_331 | Transitional meningioma (WHO Grade I) | 1 | F | 56 | 20 | 0 | spinal          |  | ben | N/A |
| MNG_332 | Transitional meningioma (WHO Grade I) | 1 | F | 51 | 11 | 0 | convexity       |  | ben | N/A |
| MNG_333 | Anaplastic meningioma (WHO grade III) | 3 | F | 78 | 5  | 1 | convexity       |  | mal | N/A |
| MNG_334 | Angiomatous meningioma (WHO Grade I)  | 1 | F | 67 | 6  | 0 | convexity       |  | ben | N/A |
| MNG_335 | Atypical meningioma (WHO grade II)    | 2 | M | 76 | 11 | 0 | basal           |  | int | N/A |
| MNG_336 | Atypical meningioma (WHO grade II)    | 2 | F | 48 | 15 | 0 | basal           |  | ben | N/A |
| MNG_337 | Atypical meningioma (WHO grade II)    | 2 | F | 61 | 13 | 0 | convexity       |  | ben | N/A |
| MNG_338 | Transitional meningioma (WHO Grade I) | 1 | F | 53 | 15 | 0 | supratentorial  |  | ben | N/A |
| MNG_339 | Atypical meningioma (WHO grade II)    | 2 | F | 33 | 19 | 0 | convexity       |  | int | N/A |

|         |                                         |   |   |     |    |   |                 |  |     |     |
|---------|-----------------------------------------|---|---|-----|----|---|-----------------|--|-----|-----|
| MNG_340 | Atypical meningioma (WHO grade II)      | 2 | F | 69  | 14 | 0 | convexity       |  | int | N/A |
| MNG_341 | Atypical meningioma (WHO grade II)      | 2 | F | 67  | 12 | 0 | convexity       |  | ben | N/A |
| MNG_342 | Anaplastic meningioma (WHO grade III)   | 3 | M | 80  | 1  | 1 | supratentorial  |  | int | N/A |
| MNG_343 | Atypical meningioma (WHO grade II)      | 2 | M | 70  | 13 | 0 | supratentorial  |  | int | N/A |
| MNG_344 | Atypical meningioma (WHO grade II)      | 2 | F | 54  | 15 | 0 | convexity       |  | int | N/A |
| MNG_345 | Fibroblastic meningioma (WHO Grade I)   | 1 | F | 47  | 18 | 0 | convexity       |  | ben | N/A |
| MNG_346 | Atypical meningioma (WHO grade II)      | 2 | F | 16  | 13 | 0 | spinal          |  | int | N/A |
| MNG_347 | Atypical meningioma (WHO grade II)      | 2 | F | 33  | 20 | 0 | posterior fossa |  | ben | N/A |
| MNG_348 | Fibroblastic meningioma (WHO Grade I)   | 1 | F | 73  | 19 | 0 | basal           |  | ben | N/A |
| MNG_349 | Meningioma NOS                          | 1 | M | 49  | 11 | 0 | convexity       |  | int | N/A |
| MNG_350 | Transitional meningioma (WHO Grade I)   | 1 | M | 74  | 36 | 1 | convexity       |  | int | N/A |
| MNG_351 | Transitional meningioma (WHO Grade I)   | 1 | F | 40  | 22 | 1 | basal           |  | ben | N/A |
| MNG_352 | Atypical meningioma (WHO grade II)      | 2 | F | 82  | 11 | 0 | convexity       |  | mal | N/A |
| MNG_353 | Atypical meningioma (WHO grade II)      | 2 | M | 57  | 16 | 0 | convexity       |  | mal | N/A |
| MNG_354 | Atypical meningioma (WHO grade II)      | 2 | F | N/A | 2  | 0 | convexity       |  | int | N/A |
| MNG_355 | Atypical meningioma (WHO grade II)      | 2 | F | 28  | 12 | 0 | supratentorial  |  | int | N/A |
| MNG_356 | Meningothelial meningioma (WHO Grade I) | 1 | F | 35  | 11 | 0 | basal           |  | ben | N/A |
| MNG_357 | Atypical meningioma (WHO grade II)      | 2 | F | 75  | 1  | 0 | supratentorial  |  | int | N/A |
| MNG_358 | Atypical meningioma (WHO grade II)      | 2 | F | 74  | 4  | 0 | convexity       |  | int | N/A |
| MNG_359 | Meningioma NOS                          | 1 | F | 42  | 3  | 0 | convexity       |  | ben | N/A |
| MNG_360 | Transitional meningioma (WHO Grade I)   | 1 | F | 66  | 7  | 0 | convexity       |  | int | N/A |
| MNG_361 | Meningioma NOS                          | 1 | F | 66  | 8  | 0 | convexity       |  | int | N/A |
| MNG_362 | Meningioma NOS                          | 1 | F | 59  | 9  | 0 | supratentorial  |  | int | N/A |
| MNG_363 | Atypical meningioma (WHO grade II)      | 2 | F | 84  | 2  | 0 | convexity       |  | mal | N/A |
| MNG_364 | Fibroblastic meningioma (WHO Grade I)   | 1 | M | 66  | 15 | 1 | basal           |  | int | N/A |
| MNG_365 | Atypical meningioma (WHO grade II)      | 2 | F | 64  | 3  | 0 | supratentorial  |  | int | N/A |
| MNG_366 | Meningioma NOS                          | 1 | F | 78  | 1  | 0 | convexity       |  | ben | N/A |
| MNG_367 | Meningioma NOS                          | 1 | M | 16  | 9  | 0 | convexity       |  | int | N/A |
| MNG_368 | Metaplastic meningioma (WHO Grade I)    | 1 | F | 65  | 11 | 0 | convexity       |  | ben | N/A |
| MNG_369 | Atypical meningioma (WHO grade II)      | 2 | F | 56  | 7  | 0 | convexity       |  | mal | N/A |
| MNG_370 | Atypical meningioma (WHO grade II)      | 2 | M | 85  | 9  | 0 | basal           |  | ben | N/A |
| MNG_371 | Fibroblastic meningioma (WHO Grade I)   | 1 | F | 52  | 4  | 0 | convexity       |  | ben | N/A |
| MNG_372 | Fibroblastic meningioma (WHO Grade I)   | 1 | F | N/A | 12 | 0 | convexity       |  | ben | N/A |
| MNG_373 | Fibroblastic meningioma (WHO Grade I)   | 1 | F | N/A | 3  | 0 | convexity       |  | ben | N/A |
| MNG_374 | Atypical meningioma (WHO grade II)      | 2 | M | 51  | 51 | 0 | convexity       |  | int | N/A |
| MNG_375 | Transitional meningioma (WHO Grade I)   | 1 | F | 57  | 15 | 0 | convexity       |  | ben | N/A |
| MNG_376 | Meningioma NOS                          | 1 | F | 84  | 3  | 0 | basal           |  | ben | N/A |
| MNG_377 | Atypical meningioma (WHO grade II)      | 2 | F | 58  | 11 | 0 | convexity       |  | int | N/A |

|         |                                         |   |   |     |     |   |                 |  |     |     |
|---------|-----------------------------------------|---|---|-----|-----|---|-----------------|--|-----|-----|
| MNG_378 | Meningothelial meningioma (WHO Grade I) | 1 | M | 56  | 45  | 1 | convexity       |  | int | N/A |
| MNG_379 | Meningioma NOS                          | 1 | F | 38  | 7   | 0 | convexity       |  | ben | N/A |
| MNG_380 | Atypical meningioma (WHO grade II)      | 2 | M | 22  | 5   | 0 | convexity       |  | int | N/A |
| MNG_381 | Meningioma NOS                          | 1 | M | 52  | 2   | 0 | convexity       |  | ben | N/A |
| MNG_382 | Meningioma NOS                          | 1 | M | 71  | 1   | 0 | supratentorial  |  | ben | N/A |
| MNG_383 | Meningioma NOS                          | 1 | M | 61  | 3   | 0 | convexity       |  | int | N/A |
| MNG_384 | Atypical meningioma (WHO grade II)      | 2 | F | 74  | 4   | 0 | basal           |  | int | N/A |
| MNG_385 | Meningioma NOS                          | 1 | F | 40  | 6   | 0 | basal           |  | ben | N/A |
| MNG_386 | Meningioma NOS                          | 1 | M | 53  | 7   | 0 | posterior fossa |  | ben | N/A |
| MNG_387 | Atypical meningioma (WHO grade II)      | 2 | M | 58  | 5   | 0 | convexity       |  | mal | N/A |
| MNG_388 | Transitional meningioma (WHO Grade I)   | 1 | M | 82  | 2   | 0 | convexity       |  | ben | N/A |
| MNG_389 | Meningioma NOS                          | 1 | M | 75  | 3   | 0 | spinal          |  | ben | N/A |
| MNG_390 | Atypical meningioma (WHO grade II)      | 2 | M | 35  | 5   | 0 | convexity       |  | int | N/A |
| MNG_391 | Meningioma NOS                          | 1 | F | 72  | 8   | 0 | convexity       |  | int | N/A |
| MNG_392 | Atypical meningioma (WHO grade II)      | 2 | M | 70  | 3   | 0 | basal           |  | int | N/A |
| MNG_393 | Atypical meningioma (WHO grade II)      | 2 | F | 49  | 11  | 0 | convexity       |  | int | N/A |
| MNG_394 | Atypical meningioma (WHO grade II)      | 2 | M | 64  | 9   | 0 | basal           |  | int | N/A |
| MNG_395 | Atypical meningioma (WHO grade II)      | 2 | M | N/A | 127 | 0 | convexity       |  | ben | wt  |
| MNG_396 | Atypical meningioma (WHO grade II)      | 2 | F | N/A | 122 | 0 | convexity       |  | ben | wt  |
| MNG_397 | Atypical meningioma (WHO grade II)      | 2 | M | N/A | 121 | 0 | convexity       |  | int | wt  |
| MNG_398 | Atypical meningioma (WHO grade II)      | 2 | F | N/A | 149 | 0 | basal           |  | mal | wt  |
| MNG_399 | Atypical meningioma (WHO grade II)      | 2 | F | N/A | 141 | 0 | convexity       |  | int | wt  |
| MNG_400 | Atypical meningioma (WHO grade II)      | 2 | F | N/A | 140 | 0 | spinal          |  | int | wt  |
| MNG_401 | Atypical meningioma (WHO grade II)      | 2 | M | N/A | 23  | 1 | basal           |  | int | wt  |
| MNG_402 | Atypical meningioma (WHO grade II)      | 2 | F | N/A | 140 | 0 | basal           |  | ben | wt  |
| MNG_403 | Atypical meningioma (WHO grade II)      | 2 | M | N/A | 27  | 1 | convexity       |  | int | wt  |
| MNG_404 | Atypical meningioma (WHO grade II)      | 2 | M | N/A | 128 | 0 | convexity       |  | int | wt  |
| MNG_405 | Atypical meningioma (WHO grade II)      | 2 | M | N/A | 16  | 0 | convexity       |  | int | wt  |
| MNG_406 | Atypical meningioma (WHO grade II)      | 2 | M | N/A | 21  | 1 | convexity       |  | int | wt  |
| MNG_407 | Atypical meningioma (WHO grade II)      | 2 | F | N/A | 15  | 1 | basal           |  | int | wt  |
| MNG_408 | Angiomatous meningioma (WHO Grade I)    | 1 | M | 61  | 39  | 0 | convexity       |  | ben | wt  |
| MNG_409 | Atypical meningioma (WHO grade II)      | 2 | F | 84  | 2   | 0 | supratentorial  |  | ben | wt  |
| MNG_410 | Atypical meningioma (WHO grade II)      | 2 | F | 69  | 45  | 0 | N/A             |  | int | wt  |
| MNG_411 | Transitional meningioma (WHO Grade I)   | 1 | F | 71  | 24  | 0 | convexity       |  | int | wt  |
| MNG_412 | Transitional meningioma (WHO Grade I)   | 1 | F | 58  | 33  | 0 | N/A             |  | int | wt  |
| MNG_413 | Atypical meningioma (WHO grade II)      | 2 | F | 60  | 51  | 0 | N/A             |  | ben | wt  |
| MNG_414 | Transitional meningioma (WHO Grade I)   | 1 | F | 64  | 51  | 0 | convexity       |  | ben | wt  |
| MNG_415 | Transitional meningioma (WHO Grade I)   | 1 | F | 62  | 54  | 0 | N/A             |  | int | wt  |

|         |                                         |   |   |    |     |   |                |  |     |       |
|---------|-----------------------------------------|---|---|----|-----|---|----------------|--|-----|-------|
| MNG_416 | Atypical meningioma (WHO grade II)      | 2 | F | 65 | 39  | 0 | basal          |  | ben | wt    |
| MNG_417 | Chordoid meningioma (WHO grade II)      | 2 | F | 45 | 3   | 0 | convexity      |  | ben | wt    |
| MNG_418 | Transitional meningioma (WHO Grade I)   | 1 | M | 65 | 78  | 1 | supratentorial |  | ben | N/A   |
| MNG_419 | Transitional meningioma (WHO Grade I)   | 1 | M | 63 | 76  | 1 | basal          |  | int | N/A   |
| MNG_420 | Angiomatous meningioma (WHO Grade I)    | 1 | F | 55 | 3   | 0 | convexity      |  | ben | wt    |
| MNG_421 | Meningothelial meningioma (WHO Grade I) | 1 | F | 74 | 63  | 1 | convexity      |  | int | N/A   |
| MNG_422 | Atypical meningioma (WHO grade II)      | 2 | F | 31 | 39  | 1 | supratentorial |  | int | wt    |
| MNG_423 | Transitional meningioma (WHO Grade I)   | 1 | F | 63 | 46  | 1 | convexity      |  | int | wt    |
| MNG_424 | Transitional meningioma (WHO Grade I)   | 1 | F | 50 | 2   | 1 | supratentorial |  | int | N/A   |
| MNG_425 | Chordoid meningioma (WHO grade II)      | 2 | F | 44 | 31  | 0 | convexity      |  | ben | wt    |
| MNG_426 | Atypical meningioma (WHO grade II)      | 2 | M | 46 | 39  | 0 | basal          |  | int | wt    |
| MNG_427 | Atypical meningioma (WHO grade II)      | 2 | F | 47 | 3   | 0 | convexity      |  | ben | wt    |
| MNG_428 | Meningothelial meningioma (WHO Grade I) | 1 | F | 51 | 291 | 0 | supratentorial |  | ben | wt    |
| MNG_429 | Atypical meningioma (WHO grade II)      | 2 | F | 80 | 25  | 0 | convexity      |  | ben | wt    |
| MNG_430 | Meningothelial meningioma (WHO Grade I) | 1 | F | 50 | 11  | 1 | basal          |  | ben | wt    |
| MNG_431 | Atypical meningioma (WHO grade II)      | 2 | F | 58 | 6   | 0 | convexity      |  | int | wt    |
| MNG_432 | Fibroblastic meningioma (WHO Grade I)   | 1 | F | 56 | 159 | 0 | convexity      |  | ben | wt    |
| MNG_433 | Microcystic meningioma (WHO grade I)    | 1 | F | 63 | 3   | 0 | convexity      |  | ben | wt    |
| MNG_434 | Transitional meningioma (WHO Grade I)   | 1 | F | 50 | 111 | 0 | supratentorial |  | ben | wt    |
| MNG_435 | Chordoid meningioma (WHO grade II)      | 2 | F | 47 | 28  | 1 | convexity      |  | ben | wt    |
| MNG_436 | Fibroblastic meningioma (WHO Grade I)   | 1 | F | 51 | 49  | 0 | convexity      |  | ben | wt    |
| MNG_437 | Atypical meningioma (WHO grade II)      | 2 | F | 76 | 4   | 0 | convexity      |  | int | wt    |
| MNG_438 | Psammomatous meningioma (WHO grade I)   | 1 | F | 69 | 61  | 0 | spinal         |  | ben | wt    |
| MNG_439 | Psammomatous meningioma (WHO grade I)   | 1 | F | 73 | 46  | 0 | spinal         |  | int | wt    |
| MNG_440 | Psammomatous meningioma (WHO grade I)   | 1 | F | 47 | 59  | 0 | convexity      |  | ben | wt    |
| MNG_441 | Metaplastic meningioma (WHO Grade I)    | 1 | M | 66 | 13  | 0 | convexity      |  | ben | wt    |
| MNG_442 | Psammomatous meningioma (WHO grade I)   | 1 | F | 72 | 40  | 0 | convexity      |  | ben | wt    |
| MNG_443 | Metaplastic meningioma (WHO Grade I)    | 1 | F | 60 | 72  | 0 | convexity      |  | int | wt    |
| MNG_444 | Psammomatous meningioma (WHO grade I)   | 1 | F | 71 | 66  | 0 | convexity      |  | ben | wt    |
| MNG_445 | Psammomatous meningioma (WHO grade I)   | 1 | M | 29 | 67  | 0 | spinal         |  | int | wt    |
| MNG_446 | Meningothelial meningioma (WHO Grade I) | 1 | F | 69 | 143 | 0 | spinal         |  | ben | wt    |
| MNG_447 | Transitional meningioma (WHO Grade I)   | 1 | F | 59 | 6   | 0 | convexity      |  | ben | wt    |
| MNG_448 | Meningothelial meningioma (WHO Grade I) | 1 | F | 64 | 1   | 0 | spinal         |  | ben | wt    |
| MNG_449 | Meningothelial meningioma (WHO Grade I) | 1 | F | 66 | 142 | 0 | N/A            |  | ben | wt    |
| MNG_450 | Angiomatous meningioma (WHO Grade I)    | 1 | F | 68 | 3   | 0 | basal          |  | ben | wt    |
| MNG_451 | Transitional meningioma (WHO Grade I)   | 1 | F | 54 | 56  | 0 | convexity      |  | ben | wt    |
| MNG_452 | Meningothelial meningioma (WHO Grade I) | 1 | F | 59 | 2   | 0 | spinal         |  | ben | wt    |
| MNG_453 | Atypical meningioma (WHO grade II)      | 2 | M | 54 | 15  | 1 | convexity      |  | int | C228T |

|         |                                         |   |   |    |     |   |                 |  |     |       |
|---------|-----------------------------------------|---|---|----|-----|---|-----------------|--|-----|-------|
| MNG_454 | Transitional meningioma (WHO Grade I)   | 1 | F | 53 | 1   | 0 | basal           |  | ben | wt    |
| MNG_455 | Anaplastic meningioma (WHO grade III)   | 3 | M | 83 | 36  | 1 | convexity       |  | mal | wt    |
| MNG_456 | Microcystic meningioma (WHO grade I)    | 1 | F | 62 | 189 | 0 | convexity       |  | ben | wt    |
| MNG_457 | Microcystic meningioma (WHO grade I)    | 1 | F | 22 | 21  | 1 | basal           |  | ben | wt    |
| MNG_458 | Microcystic meningioma (WHO grade I)    | 1 | F | 56 | 150 | 0 | convexity       |  | int | wt    |
| MNG_459 | Transitional meningioma (WHO Grade I)   | 1 | F | 61 | 22  | 0 | posterior fossa |  | ben | wt    |
| MNG_460 | Microcystic meningioma (WHO grade I)    | 1 | M | 50 | 186 | 0 | convexity       |  | int | wt    |
| MNG_461 | Transitional meningioma (WHO Grade I)   | 1 | M | 60 | 143 | 0 | basal           |  | ben | wt    |
| MNG_462 | Transitional meningioma (WHO Grade I)   | 1 | M | 71 | 70  | 0 | basal           |  | ben | wt    |
| MNG_463 | Metaplastic meningioma (WHO Grade I)    | 1 | F | 42 | 90  | 0 | supratentorial  |  | ben | wt    |
| MNG_464 | Metaplastic meningioma (WHO Grade I)    | 1 | M | 44 | 9   | 0 | convexity       |  | ben | wt    |
| MNG_465 | Transitional meningioma (WHO Grade I)   | 1 | M | 56 | 67  | 0 | convexity       |  | int | wt    |
| MNG_466 | Atypical meningioma (WHO grade II)      | 2 | F | 71 | 71  | 1 | convexity       |  | mal | N/A   |
| MNG_467 | Transitional meningioma (WHO Grade I)   | 1 | F | 55 | 28  | 0 | posterior fossa |  | ben | wt    |
| MNG_468 | Transitional meningioma (WHO Grade I)   | 1 | F | 55 | 28  | 0 | posterior fossa |  | ben | N/A   |
| MNG_469 | Rhabdoid meningioma (WHO grade III)     | 3 | M | 77 | 9   | 1 | convexity       |  | int | C250T |
| MNG_470 | Atypical meningioma (WHO grade II)      | 2 | M | 75 | 28  | 0 | convexity       |  | mal | wt    |
| MNG_471 | Atypical meningioma (WHO grade II)      | 2 | M | 83 | 27  | 1 | convexity       |  | int | wt    |
| MNG_472 | Atypical meningioma (WHO grade II)      | 2 | M | 57 | 60  | 1 | convexity       |  | int | wt    |
| MNG_473 | Atypical meningioma (WHO grade II)      | 2 | M | 47 | 68  | 0 | convexity       |  | int | wt    |
| MNG_474 | Atypical meningioma (WHO grade II)      | 2 | F | 84 | 16  | 0 | spinal          |  | int | wt    |
| MNG_475 | Fibroblastic meningioma (WHO Grade I)   | 1 | F | 52 | 85  | 0 | convexity       |  | ben | wt    |
| MNG_476 | Atypical meningioma (WHO grade II)      | 2 | F | 56 | 2   | 0 | convexity       |  | ben | wt    |
| MNG_477 | Atypical meningioma (WHO grade II)      | 2 | F | 53 | 46  | 1 | convexity       |  | mal | wt    |
| MNG_478 | Fibroblastic meningioma (WHO Grade I)   | 1 | F | 52 | 49  | 0 | convexity       |  | int | wt    |
| MNG_479 | Atypical meningioma (WHO grade II)      | 2 | F | 64 | 48  | 1 | convexity       |  | mal | wt    |
| MNG_480 | Fibroblastic meningioma (WHO Grade I)   | 1 | F | 60 | 222 | 0 | posterior fossa |  | ben | wt    |
| MNG_481 | Transitional meningioma (WHO Grade I)   | 1 | M | 59 | 42  | 0 | convexity       |  | ben | wt    |
| MNG_482 | Meningothelial meningioma (WHO Grade I) | 1 | M | 66 | 84  | 0 | convexity       |  | ben | wt    |
| MNG_483 | Meningothelial meningioma (WHO Grade I) | 1 | F | 57 | 60  | 0 | basal           |  | ben | wt    |
| MNG_484 | Meningothelial meningioma (WHO Grade I) | 1 | M | 64 | 170 | 0 | basal           |  | ben | wt    |
| MNG_485 | Atypical meningioma (WHO grade II)      | 2 | F | 50 | 3   | 1 | supratentorial  |  | int | N/A   |
| MNG_486 | Chordoid meningioma (WHO grade II)      | 2 | F | 51 | 20  | 0 | convexity       |  | ben | wt    |
| MNG_487 | Atypical meningioma (WHO grade II)      | 2 | F | 79 | 23  | 1 | convexity       |  | int | wt    |
| MNG_488 | Atypical meningioma (WHO grade II)      | 2 | F | 38 | 65  | 0 | posterior fossa |  | ben | wt    |
| MNG_489 | Atypical meningioma (WHO grade II)      | 2 | M | 66 | 77  | 1 | convexity       |  | int | wt    |
| MNG_490 | Transitional meningioma (WHO Grade I)   | 1 | F | 62 | 12  | 0 | N/A             |  | ben | wt    |
| MNG_491 | Metaplastic meningioma (WHO Grade I)    | 1 | F | 46 | 4   | 0 | convexity       |  | ben | wt    |

|         |                                         |   |   |    |     |   |                 |  |     |       |
|---------|-----------------------------------------|---|---|----|-----|---|-----------------|--|-----|-------|
| MNG_492 | Meningothelial meningioma (WHO Grade I) | 1 | F | 67 | 55  | 1 | basal           |  | ben | wt    |
| MNG_493 | Fibroblastic meningioma (WHO Grade I)   | 1 | F | 64 | 39  | 0 | posterior fossa |  | ben | wt    |
| MNG_494 | Fibroblastic meningioma (WHO Grade I)   | 1 | F | 55 | 4   | 0 | convexity       |  | ben | wt    |
| MNG_495 | Fibroblastic meningioma (WHO Grade I)   | 1 | F | 45 | 15  | 1 | basal           |  | int | wt    |
| MNG_496 | Angiomatous meningioma (WHO Grade I)    | 1 | F | 56 | 18  | 0 | posterior fossa |  | ben | wt    |
| MNG_497 | Fibroblastic meningioma (WHO Grade I)   | 1 | F | 76 | 11  | 0 | N/A             |  | ben | wt    |
| MNG_498 | Angiomatous meningioma (WHO Grade I)    | 1 | F | 46 | 7   | 0 | spinal          |  | int | wt    |
| MNG_499 | Fibroblastic meningioma (WHO Grade I)   | 1 | F | 78 | 65  | 0 | convexity       |  | ben | wt    |
| MNG_500 | Angiomatous meningioma (WHO Grade I)    | 1 | F | 61 | 15  | 0 | basal           |  | int | wt    |
| MNG_501 | Transitional meningioma (WHO Grade I)   | 1 | M | 53 | 35  | 0 | convexity       |  | int | wt    |
| MNG_502 | Transitional meningioma (WHO Grade I)   | 1 | M | 40 | 35  | 0 | convexity       |  | int | wt    |
| MNG_503 | Meningothelial meningioma (WHO Grade I) | 1 | F | 64 | 7   | 0 | supratentorial  |  | ben | wt    |
| MNG_504 | Angiomatous meningioma (WHO Grade I)    | 1 | F | 73 | 39  | 0 | convexity       |  | ben | wt    |
| MNG_505 | Anaplastic meningioma (WHO grade III)   | 3 | M | 45 | 4   | 1 | convexity       |  | mal | wt    |
| MNG_506 | Anaplastic meningioma (WHO grade III)   | 3 | F | 69 | 39  | 0 | convexity       |  | int | wt    |
| MNG_507 | Anaplastic meningioma (WHO grade III)   | 3 | M | 63 | 1   | 1 | convexity       |  | mal | wt    |
| MNG_508 | Anaplastic meningioma (WHO grade III)   | 3 | M | 71 | 28  | 1 | posterior fossa |  | mal | wt    |
| MNG_509 | Anaplastic meningioma (WHO grade III)   | 3 | F | 74 | 16  | 1 | convexity       |  | mal | wt    |
| MNG_510 | Anaplastic meningioma (WHO grade III)   | 3 | F | 66 | 12  | 1 | convexity       |  | mal | wt    |
| MNG_511 | Anaplastic meningioma (WHO grade III)   | 3 | F | 60 | 78  | 1 | convexity       |  | mal | wt    |
| MNG_512 | Anaplastic meningioma (WHO grade III)   | 3 | M | 69 | 108 | 0 | convexity       |  | int | wt    |
| MNG_513 | Anaplastic meningioma (WHO grade III)   | 3 | M | 72 | 3   | 0 | convexity       |  | mal | wt    |
| MNG_514 | Anaplastic meningioma (WHO grade III)   | 3 | F | 56 | 32  | 1 | convexity       |  | mal | wt    |
| MNG_515 | Anaplastic meningioma (WHO grade III)   | 3 | F | 65 | 13  | 1 | convexity       |  | mal | C250T |
| MNG_516 | Anaplastic meningioma (WHO grade III)   | 3 | M | 74 | 1   | 1 | supratentorial  |  | int | wt    |
| MNG_517 | Anaplastic meningioma (WHO grade III)   | 3 | M | 67 | 10  | 1 | convexity       |  | mal | wt    |
| MNG_518 | Anaplastic meningioma (WHO grade III)   | 3 | M | 60 | 12  | 0 | convexity       |  | mal | wt    |
| MNG_519 | Anaplastic meningioma (WHO grade III)   | 3 | M | 59 | 26  | 1 | convexity       |  | mal | wt    |
| MNG_520 | Meningioma NOS                          | 1 | F | 81 | 39  | 0 | convexity       |  | int | wt    |
| MNG_521 | Meningioma NOS                          | 1 | M | 47 | 11  | 1 | convexity       |  | ben | wt    |
| MNG_522 | Transitional meningioma (WHO Grade I)   | 1 | F | 22 | 53  | 0 | N/A             |  | int | wt    |
| MNG_523 | Secretory meningioma (WHO grade I)      | 1 | M | 65 | 13  | 0 | convexity       |  | ben | wt    |
| MNG_524 | Atypical meningioma (WHO grade II)      | 2 | M | 59 | 7   | 1 | convexity       |  | int | wt    |
| MNG_525 | Clear cell meningioma (WHO grade II)    | 2 | F | 16 | 51  | 0 | posterior fossa |  | int | wt    |
| MNG_526 | Clear cell meningioma (WHO grade II)    | 2 | F | 16 | 23  | 1 | posterior fossa |  | int | N/A   |
| MNG_527 | Clear cell meningioma (WHO grade II)    | 2 | F | 27 | 78  | 1 | posterior fossa |  | int | wt    |
| MNG_528 | Clear cell meningioma (WHO grade II)    | 2 | M | 34 | 8   | 0 | spinal          |  | int | wt    |



**Suppl. Table 3 – Prognostic associations (multivariable analysis)**

|                            |                          | <b>Hazard Ratio</b> | <b>95% CI</b> | <b>p-value</b> |
|----------------------------|--------------------------|---------------------|---------------|----------------|
| <b>Age</b>                 | per 10 years increase    | 0.93                | [0.82, 1.05]  | 0.25           |
| <b>Sex</b>                 | male vs female           | 1.12                | [0.81, 1.53]  | 0.49           |
| <b>Location</b>            | convexity vs basal       | 0.76                | [0.50, 1.16]  | 0.20           |
|                            | posterior fossa vs basal | 0.54                | [0.26, 1.12]  | 0.10           |
|                            | spinal vs basal          | 0.54                | [0.16, 1.80]  | 0.32           |
|                            | supratentorial vs basal  | 1.35                | [0.64, 2.83]  | 0.43           |
| <b>WHO grade</b>           | II vs I                  | 1.54                | [1.02, 2.33]  | 0.04           |
|                            | III vs I                 | 3.09                | [1.82, 5.22]  | < 0.0001       |
| <b>MC</b>                  | int vs ben               | 4.31                | [2.69, 6.91]  | < 0.0001       |
|                            | mal vs ben               | 9.04                | [4.93, 16.57] | < 0.0001       |
| <b>CDKN2A/B homozy del</b> | yes vs no                | 2.06                | [1.20, 3.53]  | 0.0089         |

Cox regression model, n = 528, number of events = 175. including WHO grade and methylation subtype.

**Suppl. Fig. 1** – Time to progression or recurrence (TTP) of the 528 patients in the cohort stratified for *CDKN2A/B* homozygous deletion.

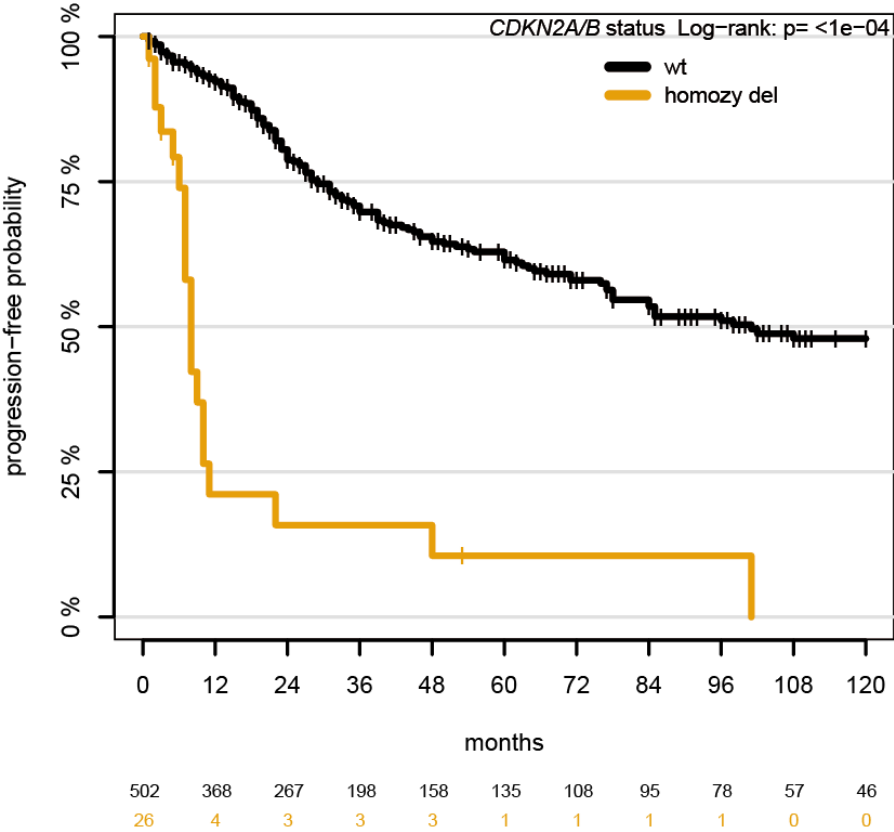



**Suppl. Fig. 3** – Time to progression or recurrence (TTP) of the 528 patients in the cohort stratified for *CDKN2A/B* homozygous deletion vs methylation class (a, b).

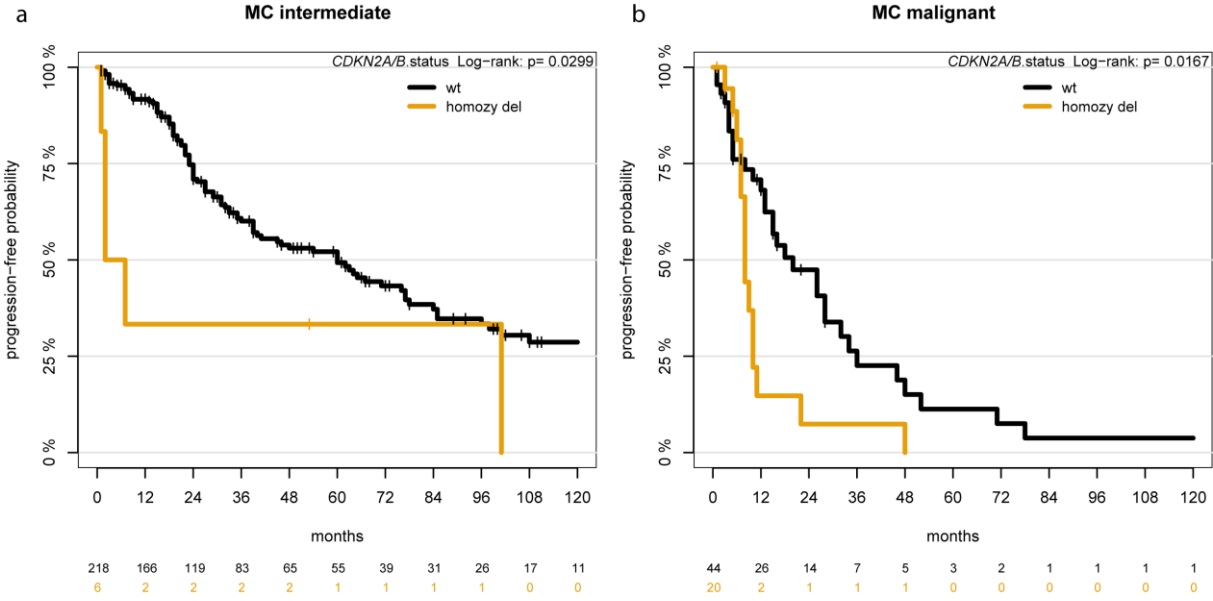

Supplement: MOESM1 [file 18158978]
